# Supplementary material for: A new species of the red alga Erythrotrichia (Erythropeltales, Rhodophyta) from Korea: Erythrotrichia johnawestii sp. nov. and observations in culture
Source: publisher site journal article supplement (doi:10.1515/bot-2022-0068), 2023-03-16
Supplement: Supplementary file 1 [file j_bot-2022-0068_suppl.docx]

**Supplementary Material**

**A new species of the red alga *Erythrotrichia* (Erythropeltales, Rhodophyta) from Korea: *Erythrotrichia johnawestii* sp. nov*.* and observations in culture**

Xianying Wen et al.

DOI 10.1515/bot-2022-0068

**Supplementary Table S1:** Isolates and GenBank accession numbers of the *rbc*L genes used for phylogenetic analyses of Erythropeltidales samples.

| **Description** | **Isolate number** | **Collection country** | **Accession number** |
| --- | --- | --- | --- |
| *Erythrocladia irregularis* | JAW4393.2 | Australia (AUS) | JF292591 |
| *Erythrocladia irregularis* | JAW4465 | France (FRA) | JF292593 |
| *Erythrocladia irregularis* | JAW4467 | France (FRA) | JF292594 |
| *Erythrocladia irregularis* | JAW4468 | Netherlands (NLD) | JF292595 |
| *Erythrocladia irregularis* | JAW4394.2 | Australia (AUS) | JF292592 |
| *Porphyropsis coccinea* | JAW4073.1 | United Kingdom (GBR) | JF292652 |
| *Porphyropsis coccinea* | JAW4678 | Japan (JPN) | JF292653 |
| *Pseudoerythrocladia kornmannii* | JAW4471.2 | France (FRA) | JF292589 |
| *Pseudoerythrocladia kornmannii* | JAW4477 | France (FRA) | JF292590 |
| *Pseudoerythrocladia kornmannii* | JAW4464 | France (FRA) | MW675664 |
| *Erythrotrichia carnea* | JAW4398.1 | Australia (AUS) | EF660274 |
| *Erythrotrichia* sp. | JAW4697 | Australia (AUS) | JF292645 |
| *Erythrotrichia* sp. | JAW4476 | France (FRA) | JF292637 |
| *Erythrotrichia longistipitata* | JAW4251 | Australia (AUS) | MW675675 |
| *Erythrotrichia* sp. | JAW4252.1 | Australia (AUS) | JF292619 |
| *Erythrotrichia* sp. | JAW4253.1 | Australia (AUS) | JF292620 |
| *Erythrotrichia* sp. | JAW4272 | Australia (AUS) | JF292621 |
| *Erythrotrichia* sp. | JAW4388 | New Caledonia (NCL) | JF292624 |
| *Erythrotrichia carnea* | JAW4425 | Australia (AUS) | EF660276 |
| *Erythrotrichia carnea* | JAW4054 | United Kingdom (GBR) | JF292612 |
| *Erythrotrichia carnea* | JAW4056 | United Kingdom (GBR) | JF292613 |
| *Erythrotrichia carnea* | JAW4050 | Ireland (IRL) | JF292611 |
| *Erythrotrichia carnea* | JAW4057 | United Kingdom (GBR) | JF292614 |
| *Erythrotrichia carnea* | JAW4645 | Brazil (BRA) | JF292640 |
| *Erythrotrichia carnea* | JAW4675 | Japan (JPN) | JF292643 |
| *Erythrotrichia* sp. | JAW4474 | France (FRA) | JF292635 |
| *Erythrotrichia* sp. | JAW4245 | Australia (AUS) | JF292616 |
| *Erythrotrichia* sp. | JAW4247 | Australia (AUS) | JF292617 |
| *Erythrotrichia* sp. | JAW4396 | Australia (AUS) | JF292627 |
| *Erythrotrichia* sp. | JAW4295 | United States of America (USA) | JF292623 |
| *Erythrotrichia* sp. | JAW4475 | Netherlands (NLD) | JF292636 |
| *Erythrotrichia* sp. | JAW4568 | South Africa (ZAF) | JF292639 |
| *Erythrotrichia* sp. | JAW4392 | Australia (AUS) | JF292625 |
| *Erythrotrichia* sp. | JAW4473 | United Kingdom (GBR) | JF292634 |
| *Erythrotrichia* sp. | JAW4397 | Australia (AUS) | JF292628 |
| *Erythrotrichia welwitschii* | JAW4469 | France (FRA) | JF292632 |
| *Erythrotrichia welwitschii* | JAW4704 | France (FRA) | MW675674 |
| *Erythrotrichia welwitschii* | JAW4471.1 | France (FRA) | JF292633 |
| *Erythrotrichia carnea* | JAW4488 | Madagascar (MDG) | EF660277 |
| *Erythrotrichia* sp. | JAW4482 | Madagascar (MDG) | JF292638 |
| *Erythrotrichia* sp. | JAW4667 | Brazil (BRA) | JF292641 |
| *Erythrotrichia* sp. | JAW4672 | Brazil (BRA) | JF292642 |
| *Erythrotrichia* sp. | JAW4274 | Australia (AUS) | JF292622 |
| *Erythrotrichia carnea* | JAW4398.2 | Australia (AUS) | EF660275 |
| *Erythrotrichia* sp. | JAW3438 | Australia (AUS) | JF292610 |
| *Erythrotrichia* sp. | JAW4393.1 | Australia (AUS) | JF292626 |
| *Sahlingia subintegra* | JAW4321 | Madagascar (MDG) | EF660278 |
| *Sahlingia subintegra* | JAW4320 | Madagascar (MDG) | JF292601 |
| *Sahlingia subintegra* | JAW4331 | Madagascar (MDG) | JF292605 |
| *Sahlingia subintegra* | JAW4345 | India (IND) | EF660279 |
| *Sahlingia subintegra* | JAW4323 | India (IND) | JF292603 |
| *Sahlingia subintegra* | JAW4578 | South Africa (ZAF) | JF292607 |
| *Sahlingia subintegra* | JAW4262.6b | Australia (AUS) | JF292599 |
| *Sahlingia subintegra* | JAW3442 | United States of America (USA) | JF292598 |
| *Sahlingia subintegra* | JAW4658 | Brazil (BRA) | JF292608 |
| *Sahlingia subintegra* | JAW4269 | Australia (AUS) | JF292600 |
| *Sahlingia subintegra* | F373 | New Zealand (NZL) | JF292609 |
| *Sahlingia subintegra* | JAW4327 | Madagascar (MDG) | JF292604 |
| *Porphyrostromium boryanum* | JAW4703 | France (FRA) | JF292646 |
| *Porphyrostromium boryanum* | JAW4710 | France (FRA) | JF292649 |
| *Porphyrostromium ligulatum* | F600 | Australia (AUS) | JF292651 |
| *Porphyrostromium japonicum* | JAW4679 | Japan (JPN) | JF292644 |
| *Porphyrostromium ciliare* | JAW4708 | France (FRA) | JF292648 |
| *Madagascaria erythrocladioides* | JAW4480 | Madagascar (MDG) | JF292596 |
| *Erythrotrichia carnea* | KNU-1 | Korea (KOR) | OP432319 |
| *Erythrotrichia westii* | KNU-2 | Korea (KOR) | OP432318 |
| *Porphyrostromium ciliare* | JAW4708 | France (FRA) | JF292648 |
| *Rhodochaete parvula* | - | Australia (AUS) | AY119777 |
| *Compsopogon caeruleus* | - | United States of America (USA) | AF087116 |
